# Supplementary material for: Electric-field-actuation of in situ composites that contain silver-coated carbon fibers in sodium sulfonate ionomers
Source: Royal Society of Chemistry journal article supplement (doi:10.1039/c2ra20766d), 2012-01-01
Supplement: c2ra20766d.pdf [file c2ra20766d.pdf]

## Supporting Information

### 1. FT-IR measurement of PSBS

The FT-IR spectrum of PSBS was shown in Figure S1. The bands at  $1253\text{ cm}^{-1}$ ,  $1160\text{ cm}^{-1}$  and  $1068\text{ cm}^{-1}$  belongs to the wagging vibrations of S=O, which confirm the existence of sulfonate monomers. The bands at  $2960$ ,  $2873$ ,  $1731$  and  $1452\text{ cm}^{-1}$  belong to vibration absorbance of  $-\text{CH}_3$ ,  $-\text{CH}_2$ , C=O and  $-\text{CH}_3$  respectively, which confirm the existences of butyl acrylate monomer unit. The bands at  $761$  and  $701\text{ cm}^{-1}$  indicate the existence of styrene monomer. Thus, this spectrum confirm the terpolymer components qualitatively.

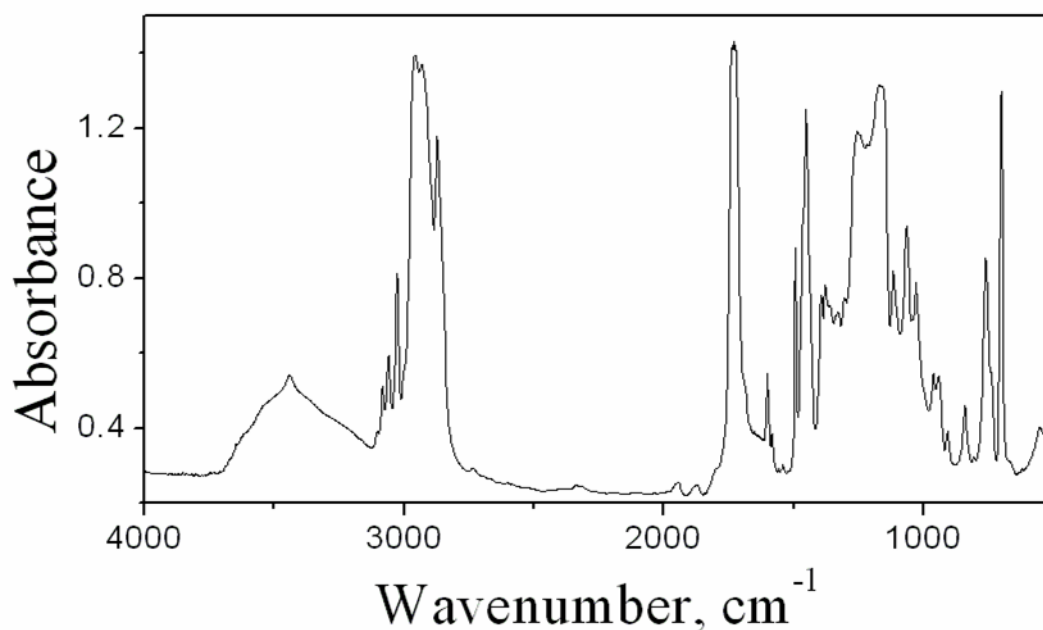

**Figure3.4 FTIR spectrum of poly (St-co-BA-co-SAS) film**

### 2. X-ray diffraction (XRD) pattern of poly (St-co-BA-co-SAS) film

Figure SI2 shows the X-ray diffraction (XRD) pattern of PSBS. The typical broad band is clearly shown around  $2\theta=20^\circ$  which indicates that PSBS is noncrystalline structure in solid state.

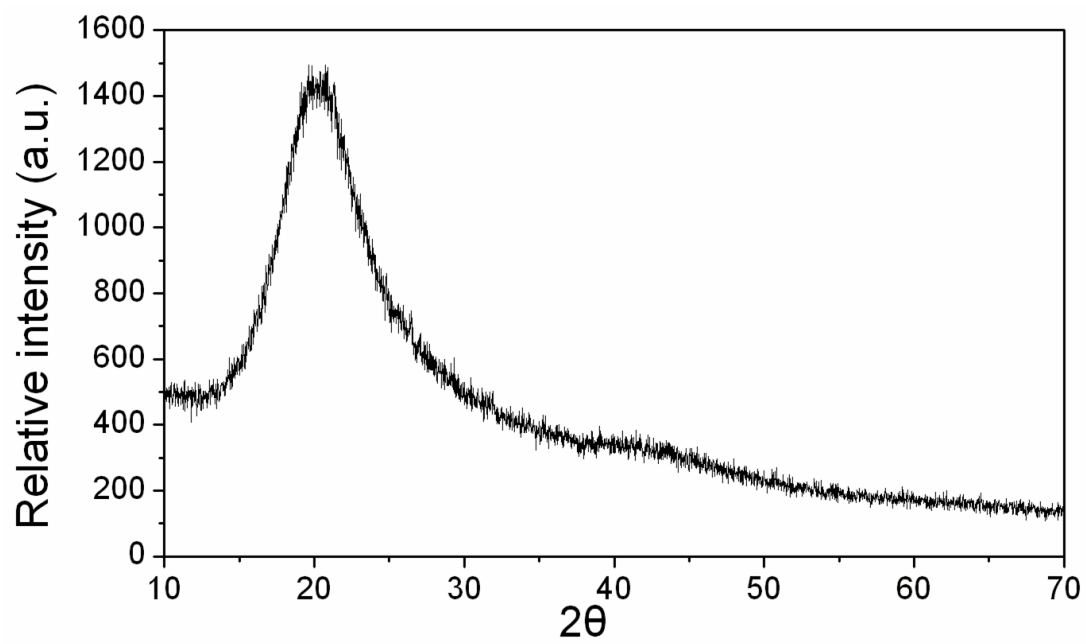

**Figure 3.5 X-ray diffraction (XRD) result of poly (St-co-BA-co-SAS) film**
